# Supplementary material
Source: PubMed Central journal article supplement (PMC3229930)
Supplement: NIHMS328236-supplement-1_si_001.pdf [file NIHMS328236-supplement-1_si_001.pdf]

# Detection of Lysozyme Using Magnetic Relaxation Switches Based on Aptamer-Functionalized Superparamagnetic Nanoparticles

Suwussa Bamrungsap, Mohammed Ibrahim Shukoor, Tao Chen, Kwame Sefah, and Weihong Tan\*

Center for Research at the Bio/nano Interface, Department of Chemistry<sup>1</sup> and  
Department of Physiology and Functional Genomics, Shands Cancer Center<sup>2</sup>,

University of Florida, Gainesville, FL 32611-7200

352-846-2410 (phone and fax)

E-mail: [tan@chem.ufl.edu](mailto:tan@chem.ufl.edu)

## Supplementary Information

**Supplementary Table 1.** The formation of magnetic clusters upon hybridization between complementary strands, as detected by changes in  $T_2$  at 5-minute intervals after mixing.

| Time (min) | $T_2$ (ms) |            |                      |
|------------|------------|------------|----------------------|
|            | MNP-Lys    | MNP-Linker | MNP-Lys + MNP-Linker |
| 5          | 93.7 ± 2.1 | 97.0 ± 1.7 | 78.0 ± 2.4           |
| 10         | 93.3 ± 1.9 | 96.8 ± 3.1 | 76.6 ± 1.8           |
| 20         | 91.6 ± 2.7 | 95.8 ± 2.6 | 76.2 ± 2.2           |

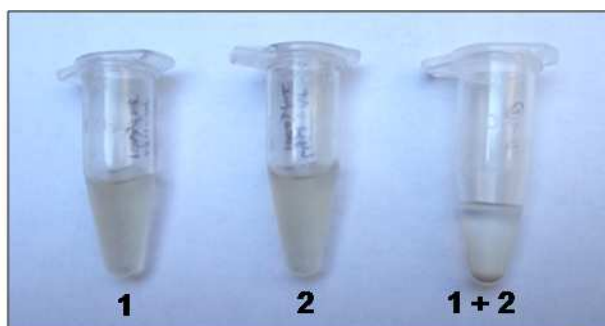

1 :  MNP-Lys aptamer    2 :  MNP-Linker

**Supplementary Figure 1.** Effect of incubating MNP-Lys aptamer with MNP-Linker at high concentration overnight. The individual conjugates showed good dispersion, corresponding to long  $T_2$ . However, the mixture of MNP-Lys and MNP-Linker showed precipitation at the bottom due to the hybridization between complementary strands, resulting in the formation of large clusters.

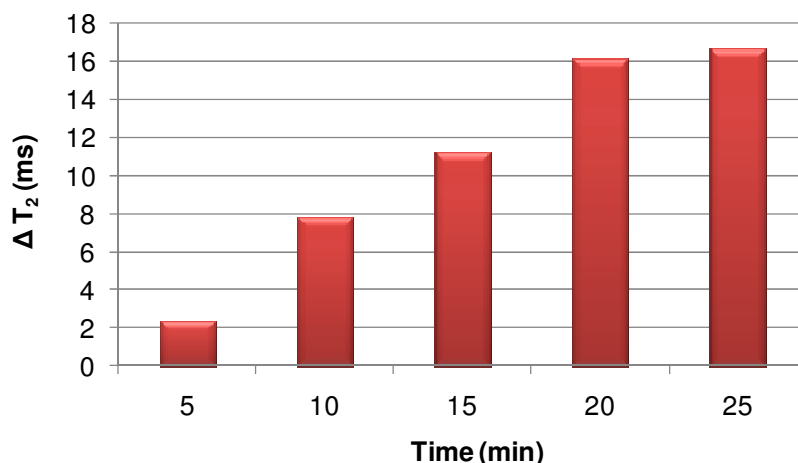

$$\Delta T_2 = T_{2\text{sample}} - T_{2\text{blank}}$$

**Supplementary Figure 2.** A gradual change of  $\Delta T_2$  upon the addition of Lys was observed, and the signal reached the maximum within 20 min, indicating the rapid disassembly of magnetic nanosensors.

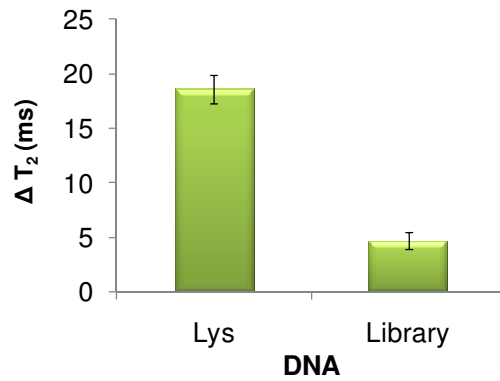

**Aptamer sequences:**

---

|             |                                                                                            |
|-------------|--------------------------------------------------------------------------------------------|
| Lys Aptamer | 5'-Biotin- <b>TTT TTT</b> ATC AGG GCT AAA GAG TGC AGA GTT <u>ACT TAG</u> <u>AGA GA</u> -3' |
| Library     | 5'-Biotin- <b>TTT TTT</b> NNN NNN NNN NNN NNN NNN NNN <u>ACT TAG</u> <u>AGA GA</u> -3'     |

---

**Supplementary Figure 3.** Specificity of the magnetic nanosensor. Random sequences were employed to test specificity; results showed no binding to target and only minimal change in  $T_2$  at a Lys concentration of 250 nM.

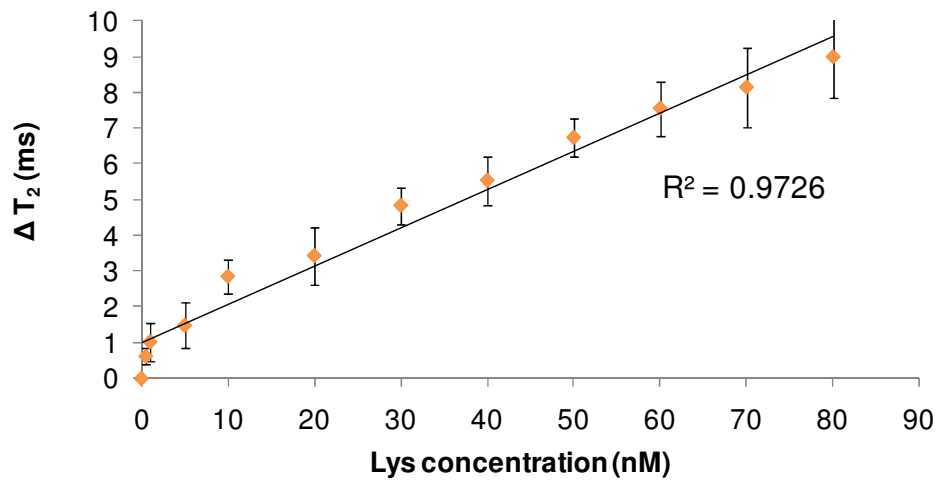

**Supplementary Figure 4.** The detection of Lys-spiked human serum using relaxometry measurements.
